# Supplementary material for: Compact accumulation of superatomic silver nanoclusters with an octahedral Ag6 core ligated by trithiane
Source: Royal Society of Chemistry journal article supplement (doi:10.1039/d2nr02411j), 2022-01-01
Supplement: d2nr02411j1.pdf [file d2nr02411j1.pdf]

## Contents

### I. Physical measurements

### II. Synthesis

### III. Computational details

### IV. Supporting figures

#### I. Physical measurements

The FT-IR spectrum was performed using KBr pellet by a WQF-520A FT-IR spectrometer. The powder X-ray diffraction (PXRD) patterns were prepared by DX-2700 X-ray diffractometer. The solid UV-Vis diffuse reflectance spectrum was measured by Agilent Cary 5000 spectrophotometer at environment temperature. Spectra were typically measured in the range of 230-900 nm. Mass spectra were recorded on a high-resolution Fourier transform ICR spectrometer with Bruker maXis Quadrupole Time-of-Flight (QTOF) mass spectrometry in positive mode. The TGA curve was recorded using a Q50 Thermogravimetric device with 10 °C/min in the nitrogen atmosphere. Luminescence was measured by a Hitachi F-7000 spectrometer. X-ray photoelectron spectroscopy (XPS) was recorded on PHI Quantum-2000. The sample was put under UHV to reach the  $10^{-8}$  Pa range. The nonmonochromatized Al K $\alpha$  source was used at 10 kV and 10 mA. All binding energies were calibrated using the C (1s) carbon peak (284.6 eV), which was applied as an internal standard. High resolution narrow-scan spectra were recorded with the electron pass energy of 50 eV and takeoff angle of 55° to achieve the maximum spectral resolution.

**X-ray Crystallography.** Intensity data of **Ag<sub>6</sub>** and **Ag<sub>6</sub>(0)·Ag<sub>6</sub>(I)** were collected on an a Bruker SMART APEX CCD diffractometer at 293 K (Cu K $\alpha$ ) and 100 K (Mo K $\alpha$ ), respectively. Absorption corrections were applied by using the program CrysAlis (multi-scan). The structures were solved by direct methods, and non-hydrogen atoms were refined anisotropically by least-squares on  $F^2$  using the SHELXTL program.

**Electron counting.** According to the counting rules introduced by Mingos and Häkkinen,<sup>1,2</sup> the three silver clusters can be considered as superatom complexes formulated as  $[L_S \cdot A_N X_M]^z$  with electron-withdrawing ligands X or weak Lewis base ligands L attached to the core with metal atoms A and an overall core charge z. Accordingly, for Ag the 5s electrons are counted and corrected by the number of electrons that are located at electron-withdrawing ligands and corrected by

the charge of the cluster. Ligands  $L$  (3S in this work) are “weak ligands” and do not affect the effective free-electron-count of the silver core. In this regard, the free electron  $n^*$  of the three clusters can be evaluated with a formula:

$$n^* = Nv_A - M - q$$

$M$  is the number of electron-withdrawing ligands,  $N$  is the number of metal atoms, an “effective metal valence”  $v_A = 1$ ,  $q$  means the overall charge of the cluster.

As a result, the shell-closing electron number  $n^*$  of **Ag<sub>6</sub>(0)** with a formula [Ag<sub>6</sub>(3S)<sub>4</sub>(OTf)<sub>4</sub>] is 2,  $n^*$  of **Ag<sub>6</sub>(I)** with a formula [Ag<sub>6</sub>(3S)<sub>4</sub>(C≡C<sup>t</sup>Bu)<sub>4</sub>]<sup>2+</sup> is zero, while **Ag<sub>6</sub>** with a formula [Ag<sub>6</sub>(3S)<sub>4</sub>(tfa)<sub>4</sub>] is also a 2-electron superatom.

## II. Synthesis

### Materials and reagents.

T-butyl acetylene ( $t\text{BuC}\equiv\text{CH}$ , 98%), 1,3,5-trithiane (**3S**, 97%), Triethylamine (TEA, 99.0%) were purchased from J&K; Silver Trifluoromethanesulfonate ( $\text{AgOTf}$ , 98%) and Silver trifluoroacetate ( $\text{AgTfa}$ , 98%) were purchased from TCI and other reagents employed were purchased from Sinopharm Chemical Reagent Co. Ltd. (Shanghai, China).  $(\text{AgC}\equiv\text{C}^t\text{Bu})_n$  was prepared by reacting of  $\text{Ag}_2\text{O}$  and  $t\text{BuC}\equiv\text{CH}$  in the presence of ammonium hydroxide.<sup>3</sup> All reagents were used as received.

**Caution!** Due to the explosive nature of silver alkynyls, great care should be taken and only small amounts should be used.

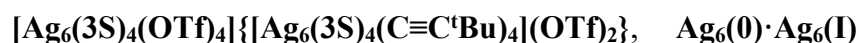

$(\text{AgC}\equiv\text{C}^t\text{Bu})_n$  (57 mg, 0.3 mmol) was dissolved in  $\text{CH}_3\text{CN}$  (5 mL) of  $\text{Ag}(\text{OTf})$  (77 mg, 0.3 mmol) under ultrasonication, then **3S** (41.5 mg, 0.3 mmol) was added creating a clear solution. The resulting solution was sealed in a 20 mL screw-top glass bottle and heated to 70 °C for 20 h. After cooled to room temperature, the light-yellow solution was filtered. The colorless hexagonal crystals were achieved by slow evaporation of the filtrate at 5 °C for 2 weeks. Yield: 10.3 mg, 5.5% based on Ag.

Anal. UV-Vis ( $\lambda$ , nm): 237 ( $\epsilon = 8.1 \times 10^4 \text{ L}\cdot\text{mol}^{-1}\cdot\text{cm}^{-1}$ ), 326 ( $\epsilon = 2.9 \times 10^4 \text{ L}\cdot\text{mol}^{-1}\cdot\text{cm}^{-1}$ ) in THF; 272, 352 in the solid state. ESI-MS (DMF): 1646.11 ( $[\text{Ag}_6(\mathbf{3S})_4(\text{OTf})_3]^+$ ) and 1241.78 ( $[\text{Ag}_{14}(\text{C}\equiv\text{C}^t\text{Bu})_{12}]^{2+}$ ). IR (KBr,  $\nu$ ,  $\text{cm}^{-1}$ ): 1023, 1257, 1169 and 1222 (OTf), 2034 (C=C), 3005–2866, 1391, 730 (**3S**). XPS (binding energy, eV): Ag 3d<sub>5/2</sub>, 367.6; Ag 3d<sub>3/2</sub>, 373.6 eV. Emission in the solid state:  $E_m = 499, 603 \text{ nm}$  (should peak), Quantum yield: 16.4%. Lifetime:  $\tau = 93.97 \pm 0.46 \mu\text{s}$ , for 499 nm;  $\tau_1 = 58.35 \pm 0.83 \mu\text{s}$  (57.93%);  $\tau_2 = 132.25 \pm 2.32 \mu\text{s}$  (42.07%) for 603 nm.

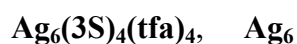

$\text{Ag}(\text{tfa})$  (132.6 mg, 0.6 mmol) was dissolved in  $\text{CH}_3\text{CN}$  (5 mL) under ultrasonication, then **3S** (41.5 g, 0.3 mmol) was added to form a clear solution. Then TEA (42  $\mu\text{L}$ , 0.3 mmol) was added. The resulting solution was sealed in a 20 mL screw-top glass bottle and heated to 70 °C for 20 h. After cooled to room temperature, the colorless block crystals were obtained directly by filtration. Yield: 42 mg, 25% based on Ag.

Anal. UV-Vis ( $\lambda$ , nm): 252 ( $\epsilon = 3.2 \times 10^4 \text{ L}\cdot\text{mol}^{-1}\cdot\text{cm}^{-1}$ ), 306 ( $\epsilon = 4.2 \times 10^4 \text{ L}\cdot\text{mol}^{-1}\cdot\text{cm}^{-1}$ ) in THF; 253, 305 in the solid state. ESI-TOF-MS (DMF): 1538.26 ( $[\text{Ag}_6(3\text{S})_4(\text{tfa})_3]^+$ ). IR (KBr,  $\nu$ ,  $\text{cm}^{-1}$ ): 1699 and 1199 (tfa<sup>-</sup>), 3029–2866, 1386, 720 (3S). XPS (binding energy, eV): Ag 3d<sub>5/2</sub>, 367.8; Ag 3d<sub>3/2</sub>, 373.8 eV. Emission in the solid state: Em = 526 nm, Quantum yield: 14.0%. Lifetime:  $\tau_1=6.64\pm 0.07 \mu\text{s}$  (38.71%);  $\tau_2=167.66\pm 1.74 \mu\text{s}$  (61.29%).

### III. DFT calculations

Density functional theory (DFT) calculations were performed with the quantum chemistry program Gaussian 16.<sup>4</sup> Molecular structures from X-ray structural determination were adopted as the calculation models after structural optimization. The 6-31G(d) basis set was used for C, H, O, S, P, and LANL2DZ for Ag.<sup>5</sup> Geometry optimizations were performed with the B3LYP functional, and time-dependent DFT calculations of the UV-vis absorption spectrum were performed with the PBE0 functional.<sup>6</sup> One hundred singlet states (nstates = 100, singlet) are chosen in the calculations of the UV-Vis absorption spectra.

1. D. Michael, P. Mingos, *Polyhedron* **1984**, *3*, 1289-1297.
2. H. Häkkinen, *Chem. Soc. Rev.* **2008**, *37*, 1847-1859.
3. (a) K. G. Liu, F. Bigdeli, H. J. Li, J. Z. Li, X. W. Yan, M. L. Hu, and A. Morsali, *Inorg. Chem.* **2020**, *59*, 6684–6688. (b) K. G. Liu, X. W. Wei, F. Bigdeli, X. M. Gao, J. Z. Li, X. W. Yan, M. L. Hu, and A. Morsali, *Inorg. Chem.* **2020**, *59*, 2248–2254.
4. M. J.Frisch, G. W.Trucks, H. B.Schlegel, G. E.Scuseria, M. A.Robb, J. R.Cheeseman, G.Scalmani, V.Barone, G. A.Petersson, H.Nakatsuji, X.Li, M.Caricato, A. V.Marenich, J.Bloino, B. G.Janesko, R.Gomperts, B.Mennucci, H. P.Hratchian, J. V.Ortiz, A. F.Izmaylov, J. L.Sonnenberg, D.Williams-Young, F.Ding, F.Lipparini, F.Egidi, J.Goings, B.Peng, A.Petrone, T.Henderson, D.Ranasinghe, V. G.Zakrzewski, J.Gao, N.Regga, G.Zheng, W.Liang, M.Hada, M.Ehara, K.Toyota, R.Fukuda, J.Hasegawa, M.Ishida, T.Nakajima, Y.Honda, O.Kitao, H.Nakai, T.Vreven, K.Throssell, J. A.Montgomery Jr, J. E.Peralta, F.Ogliaro, M. J.Bearpark, J. J.Heyd, E. N.Brothers, K. N.Kudin, V. N.Staroverov, T. A.Keith, R.Kobayashi, J.Normand, K.Raghavachari, A. P.Rendell, J. C.Burant, S. S.Iyengar, J.Tomasi, M.Cossi, J. M.Millam, M.Klene, C.Adamo, R.Cammi, J. W.Ochterski, R. L.Martin, K.Morokuma, O.Farkas, J. B.Foresman and D. J.Fox, Gaussian 16, Revision B.01, Gaussian Inc., Wallingford CT, **2016**.
5. (a) P. J. Hay and W. R. Wadt, *J. Chem. Phys.* **1985**, *82*, 299-310; (b) A. D. Becke

*Phys. Rev. A* **1988**, *38*, 3098-3100.

6. D. Coskun, S. V. Jerome and R. A. Friesner, *J. Chem. Theory Comput.* **2016**, *12*, 1121-1128.

#### IV. Supporting figures

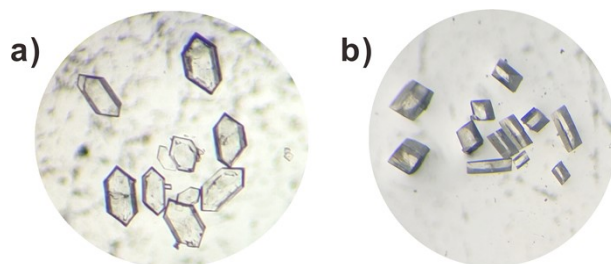

**Figure S1.** Optical image of a)  $\text{Ag}_6(0)\cdot\text{Ag}_6(\text{I})$  and b)  $\text{Ag}_6$  (right).

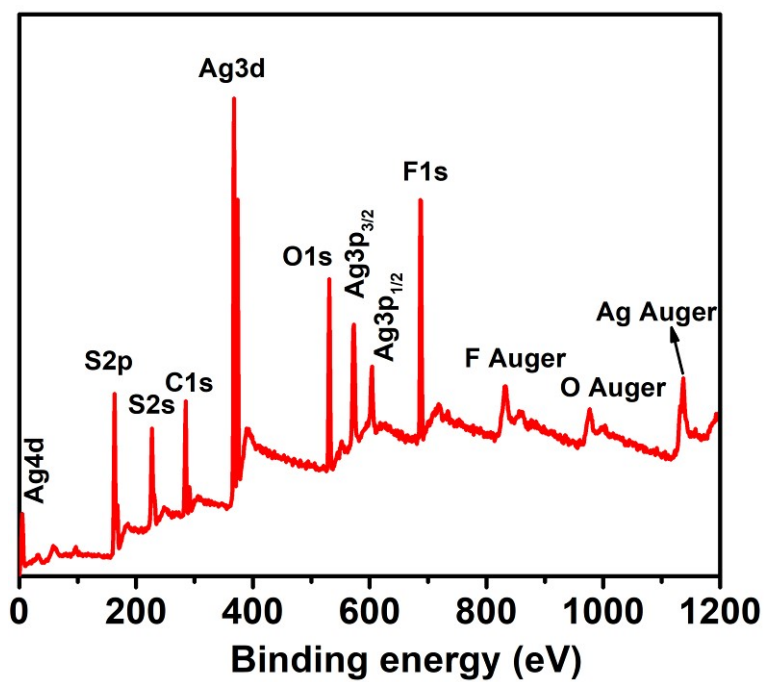

**Figure S2.** XPS of  $\text{Ag}_6(0)\cdot\text{Ag}_6(\text{I})$ .

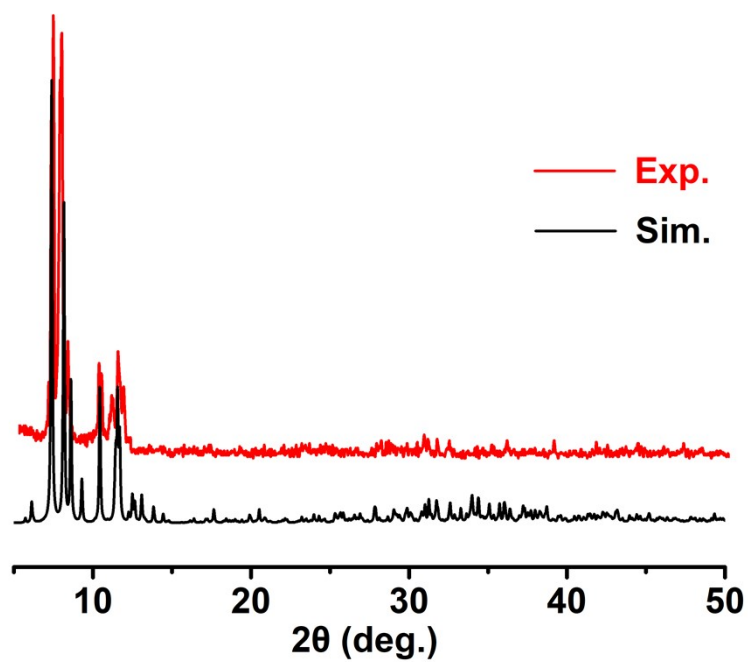

**Figure S3.** The experimental and simulated PXRD spectra of  $\text{Ag}_6(0) \cdot \text{Ag}_6(\text{I})$ .

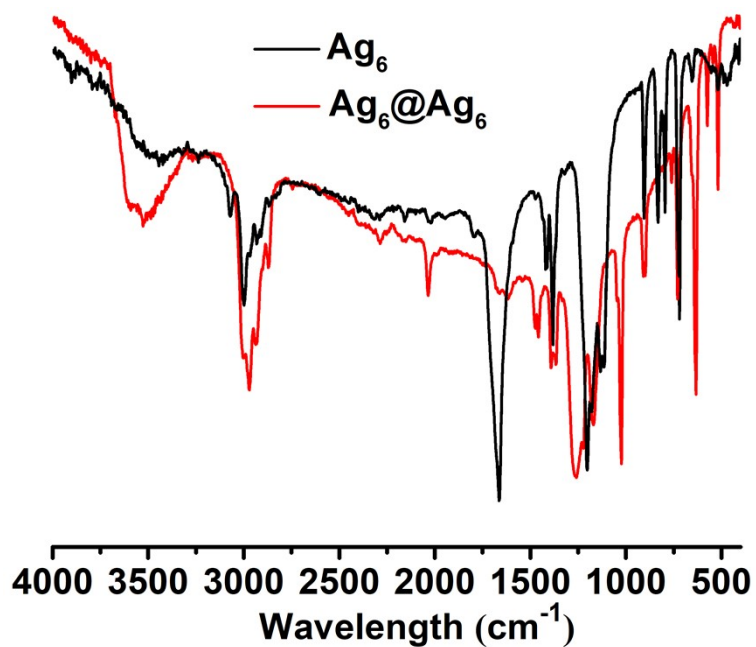

**Figure S4.** IR spectrum of  $\text{Ag}_6(0) \cdot \text{Ag}_6(\text{I})$  (red trace) and  $\text{Ag}_6$  (black trace).

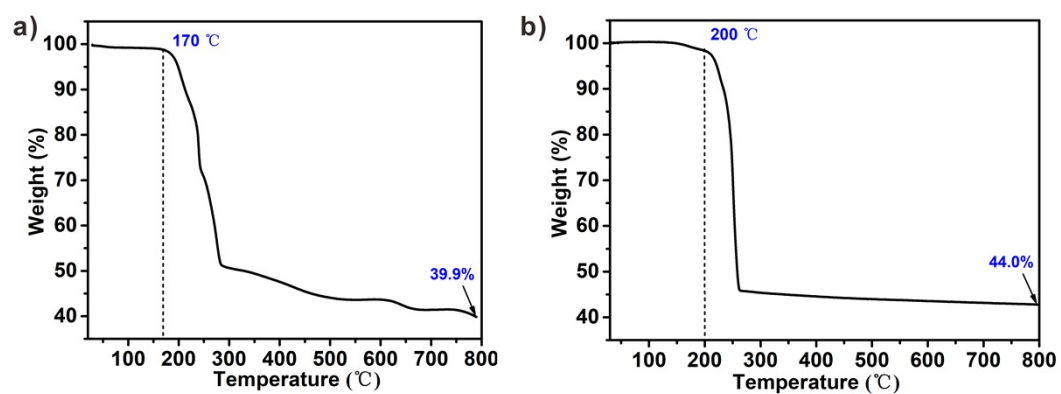

**Figure S5.** Thermogravimetric analysis (TGA) of  $\text{Ag}_6(0) \cdot \text{Ag}_6(\text{I})$  (left) and  $\text{Ag}_6$  (right) in  $\text{N}_2$  atmosphere.

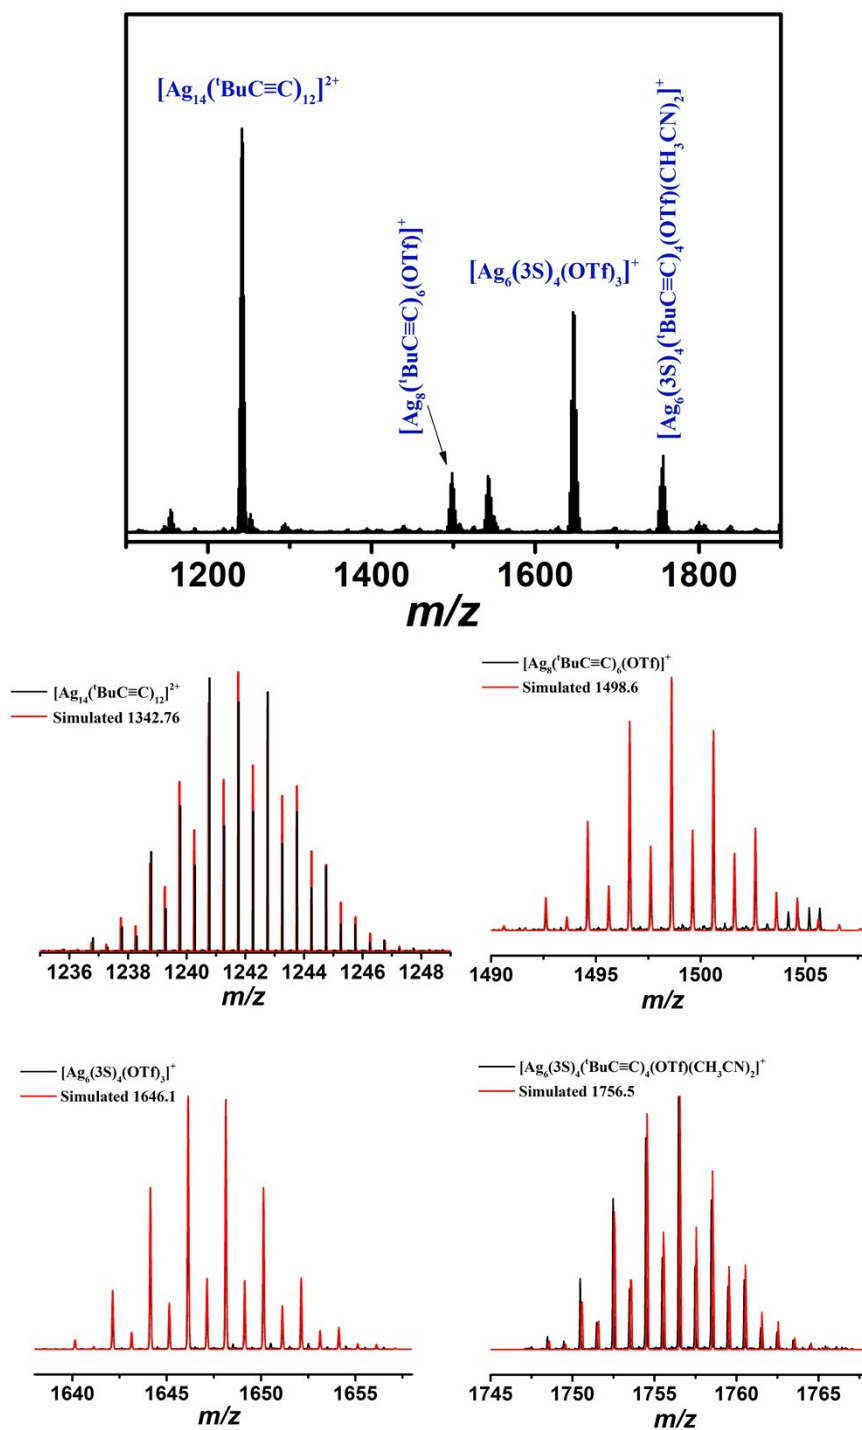

**Figure S6.** Mass spectra and the analysis of the four dominating peaks of  $\text{Ag}_6(\text{0})\cdot\text{Ag}_6(\text{I})$  in THF.



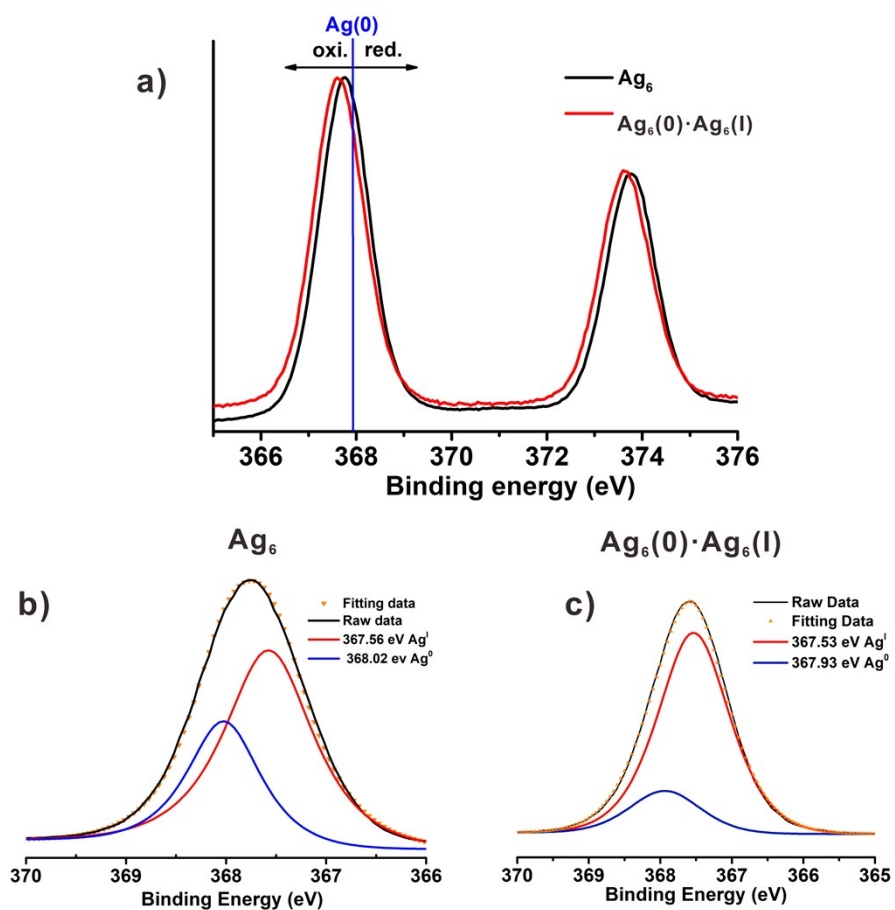

**Figure S7.** a) XPS of the expanded Ag 3d regions in  $\text{Ag}_6(0) \cdot \text{Ag}_6(\text{I})$  (red trace) and  $\text{Ag}_6$  (black trace). The Ag 3d<sub>5/2</sub> peaks of b)  $\text{Ag}_6$  and c)  $\text{Ag}_6(0) \cdot \text{Ag}_6(\text{I})$  were fitted for Ag(0) and Ag(I) peaks.

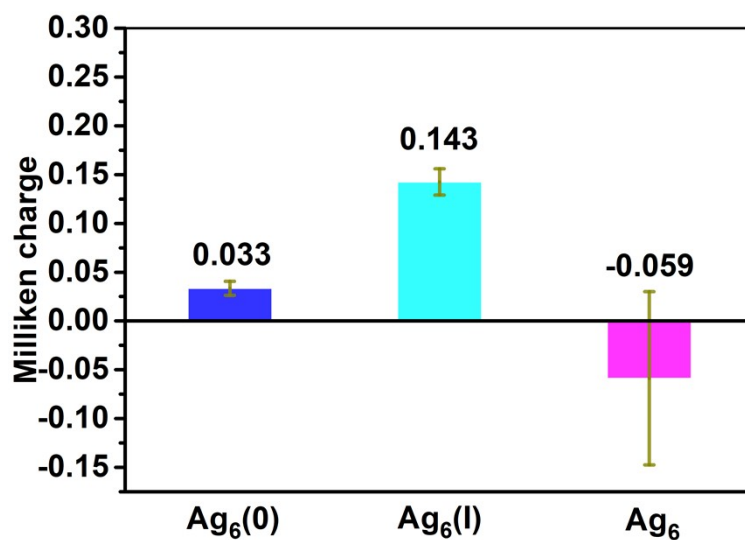

**Figure S8.** Average Milliken charges of the Ag atoms in  $\text{Ag}_6(0)$ ,  $\text{Ag}_6(\text{I})$  and  $\text{Ag}_6$ .

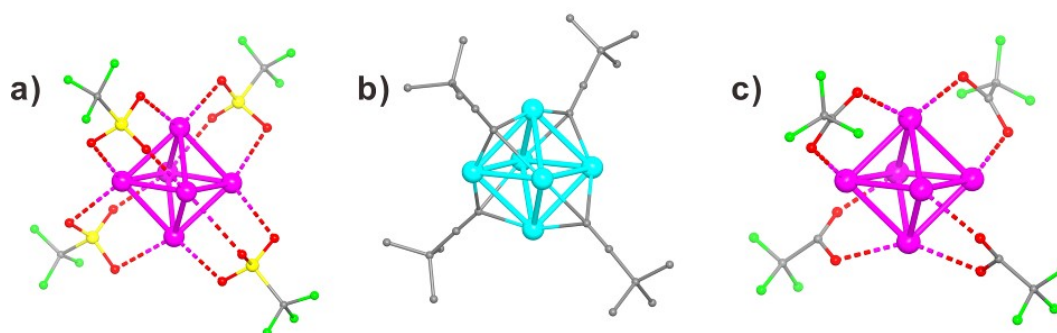

**Figure S9.** Structure comparison of a)  $\text{Ag}_6(0)$ , b)  $\text{Ag}_6(\text{I})$  and c)  $\text{Ag}_6$  showing the coordination mode of OTf,  $\text{BuC}\equiv\text{C}^-$  and  $\text{tfa}^-$  ligands, respectively.

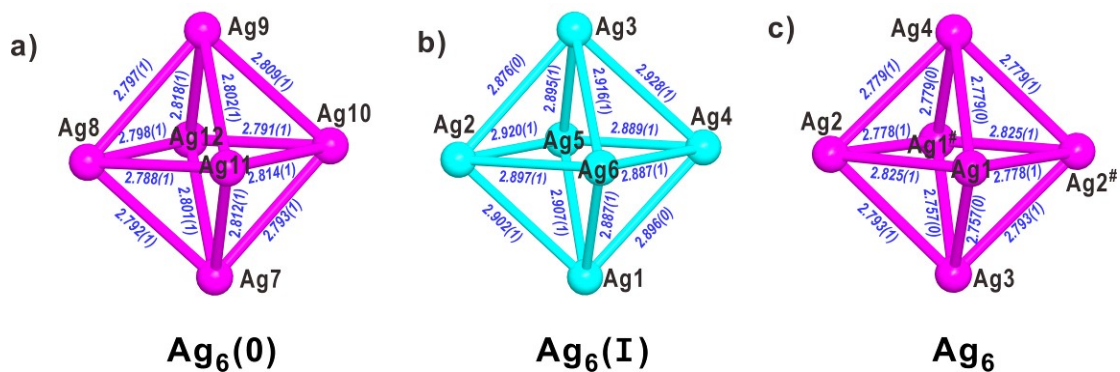

**Figure S10.** Ag-Ag distance comparison of the octahedral  $\text{Ag}_6$  core in  $\text{Ag}_6(0)$ ,  $\text{Ag}_6(\text{I})$  and  $\text{Ag}_6$ .

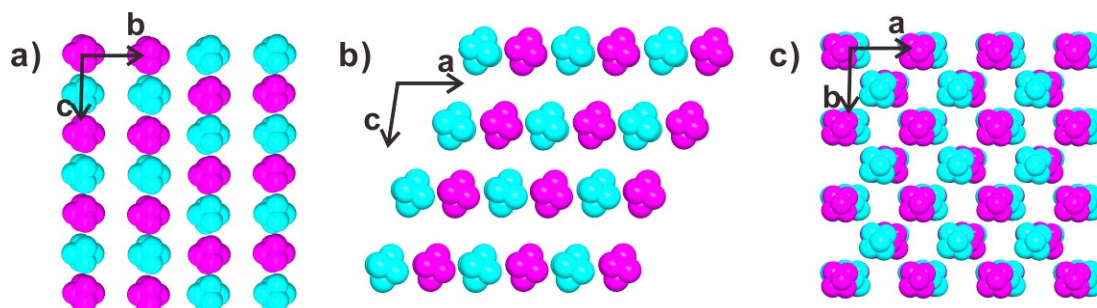

**Figure S11.** Packing of  $\text{Ag}_6(0)$  and  $\text{Ag}_6(\text{I})$  clusters in the crystal lattice, viewed along the (a) a-axis, (b) b-axis, and (c) c-axis. Ag purple  $\text{Ag}_6(0)$ , Ag light blue  $\text{Ag}_6(\text{I})$ . All the ligands are omitted for clarity.

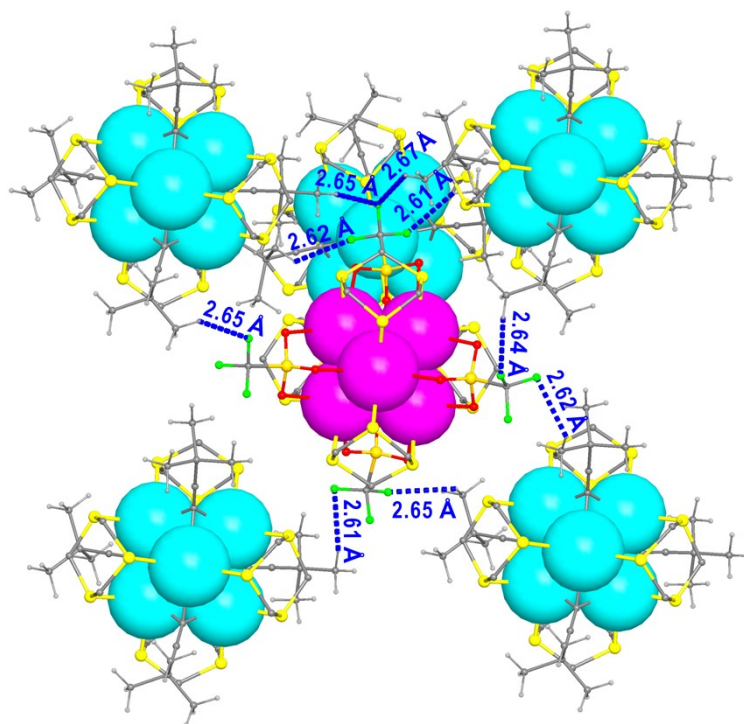

**Figure S12.** Illustration of the intercluster interactions in  $\text{Ag}_6(0)$  and  $\text{Ag}_6(\text{I})$  clusters via C-H ( $^t\text{BuC}\equiv\text{C}^-$ ) $\cdots$ F (OTf) hydrogen-bonds.

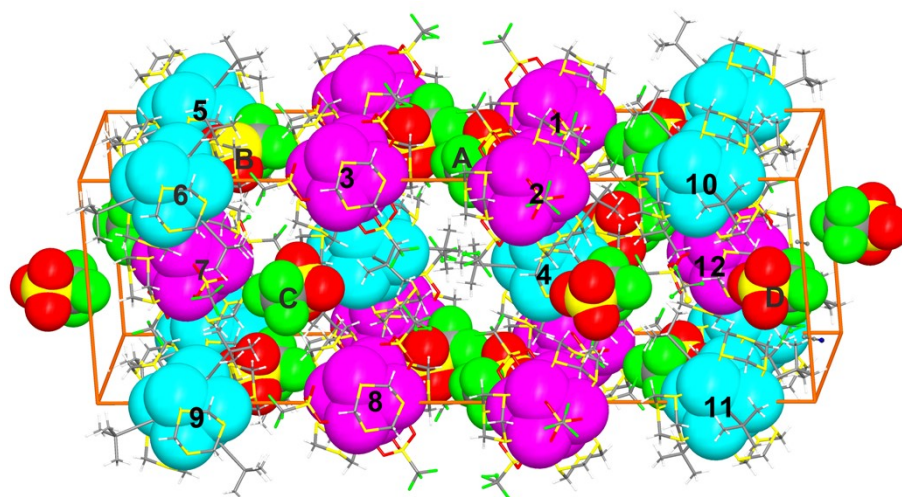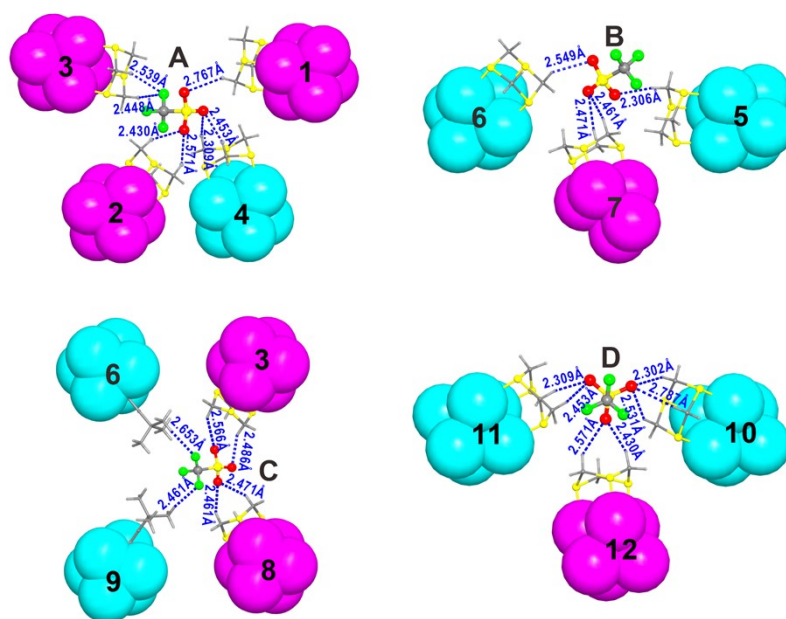

**Figure S13.** Coordination geometry of the crystallographically independent triflate anions showing the different C–H···O and C–H···F multiple hydrogen-bonding modes.

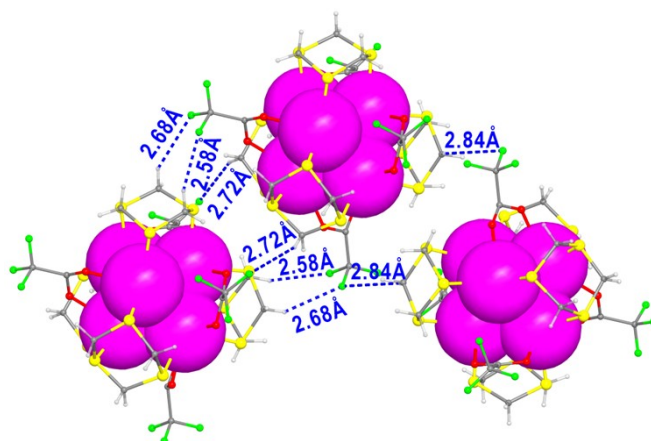

**Figure S14.** The intermolecular interactions in  $\text{Ag}_6$ . The intercluster C–H (3S)···F hydrogen bonds are in the range of 2.58–2.84 Å.

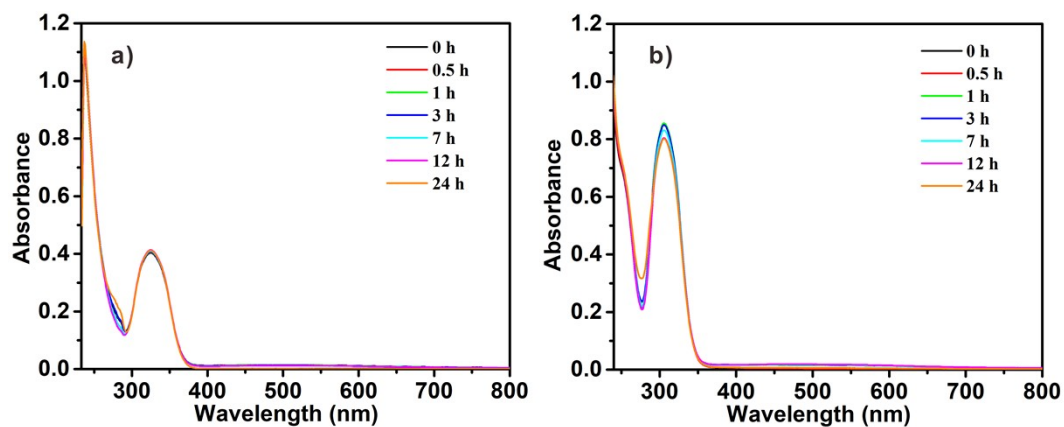

**Figure S15.** Time-dependent UV–vis spectrum of (a)  $\text{Ag}_6(0)\cdot\text{Ag}_6(\text{I})$  and (b)  $\text{Ag}_6$  in THF.



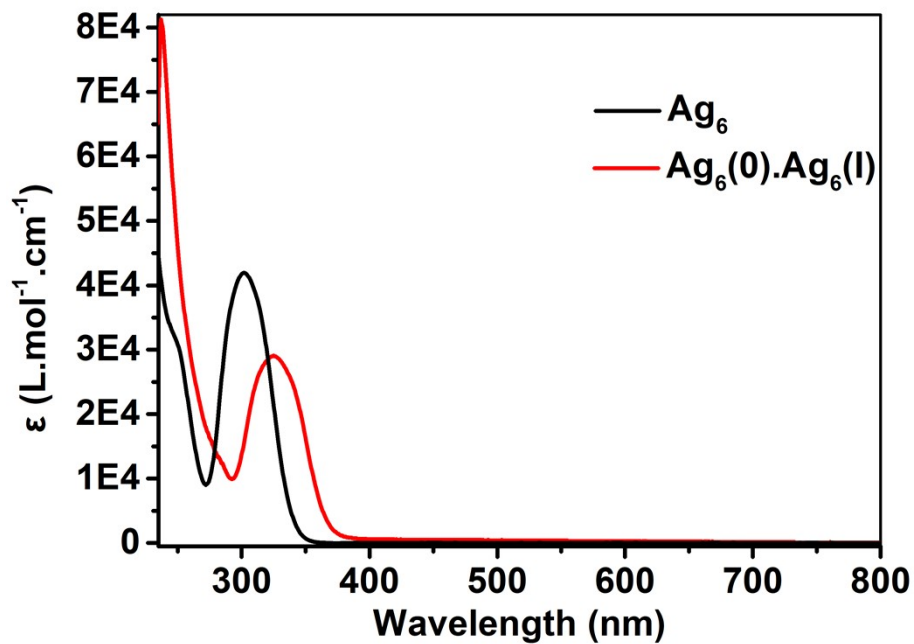

Figure S16. UV-vis spectrum of  $\text{Ag}_6(0)\cdot\text{Ag}_6(\text{I})$  and  $\text{Ag}_6$  in THF.

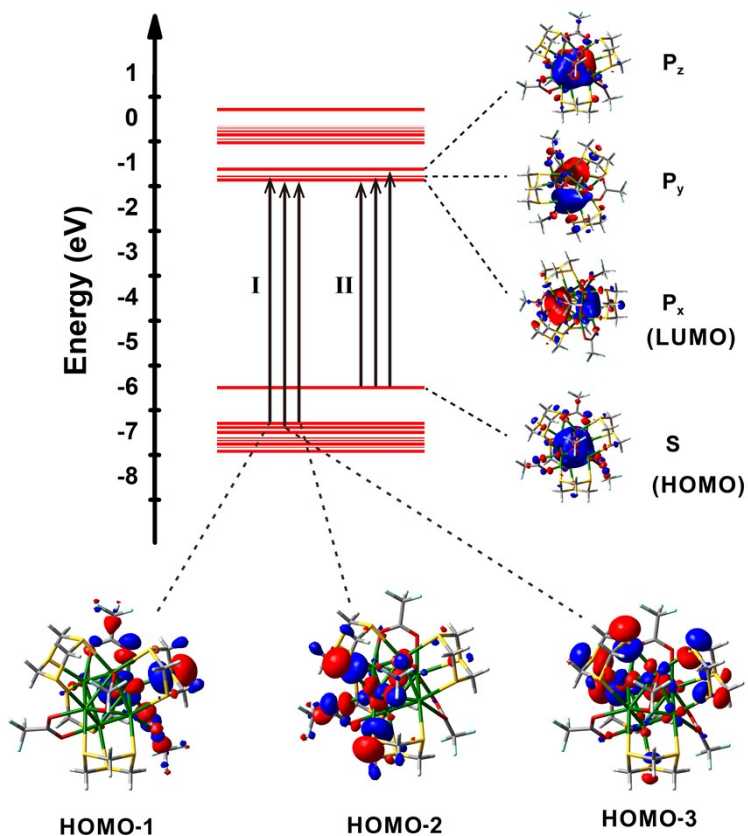

Figure S17. Energy-level correlation diagram and the orbitals involved in the transitions of  $\text{Ag}_6$ .

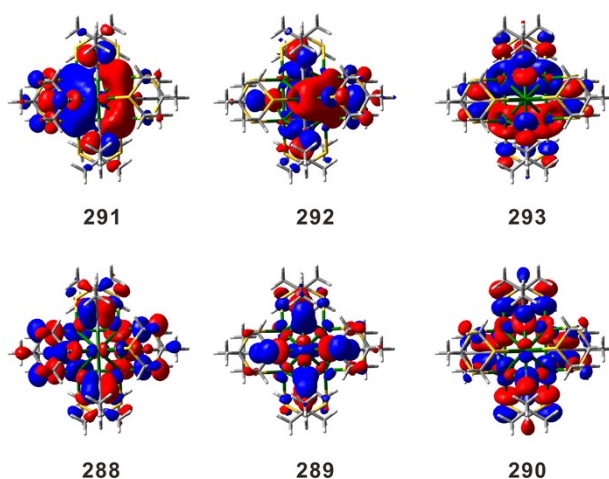

**Figure S18.** The frontier orbital of  $\text{Ag}_6(\text{I})$ . 288-290 are triple degenerated HOMO orbitals, while 291-293 are three degenerate LUMO orbitals.

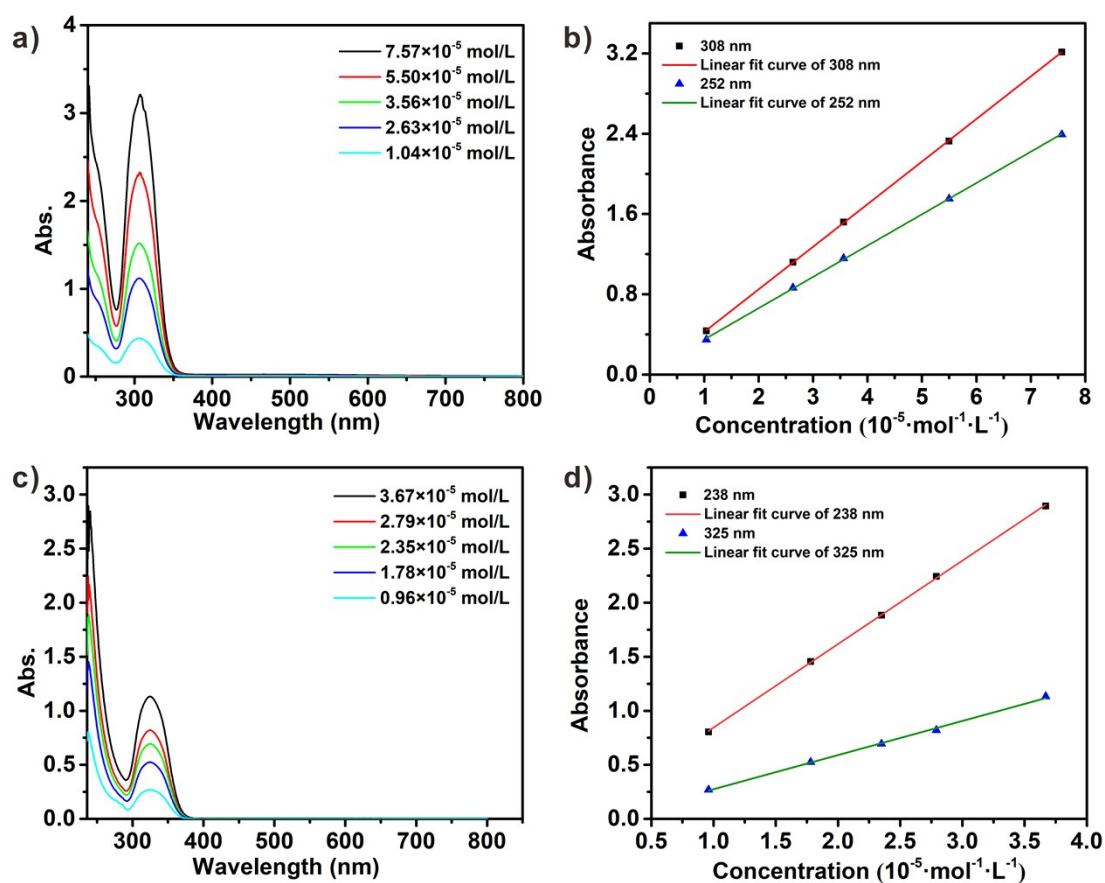

**Figure S19.** The absorption spectrum of a)  $\text{Ag}_6$  and c)  $\text{Ag}_6(0) \cdot \text{Ag}_6(\text{I})$  in THF solution by varying their concentration. The correlation between concentration and absorption intensity of b)  $\text{Ag}_6$  and d)  $\text{Ag}_6(0) \cdot \text{Ag}_6(\text{I})$  at various wavelengths.



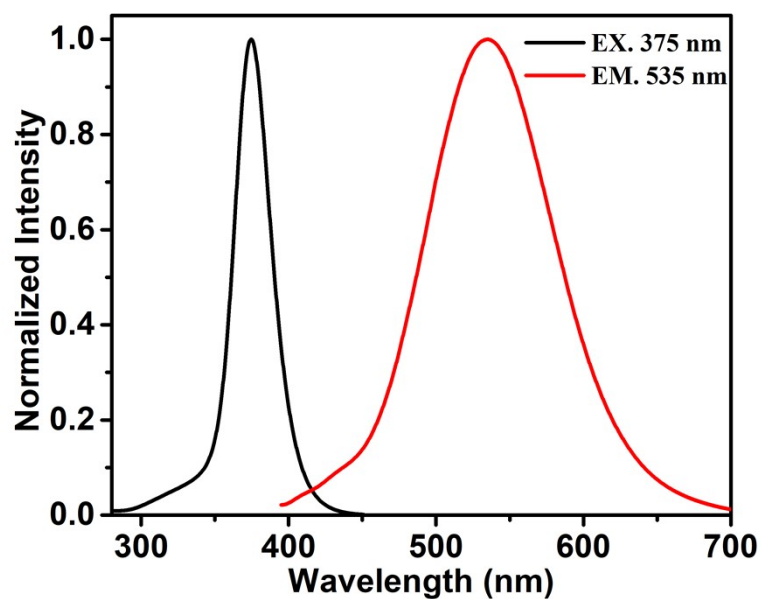

Figure S20. Excitation and emission spectra of  $\text{Ag}_6(0)\cdot\text{Ag}_6(\text{I})$  in THF.

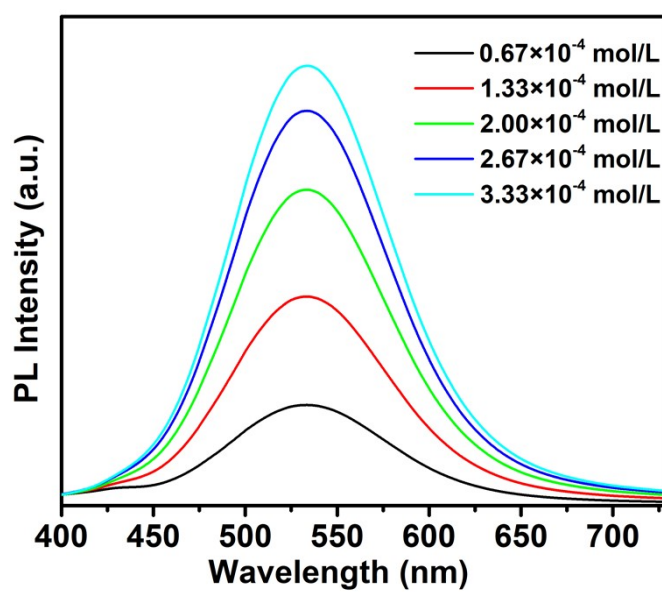

Figure S21. PL spectra of  $\text{Ag}_6(0)\cdot\text{Ag}_6(\text{I})$  in THF with different concentration. Ex = 375 nm.

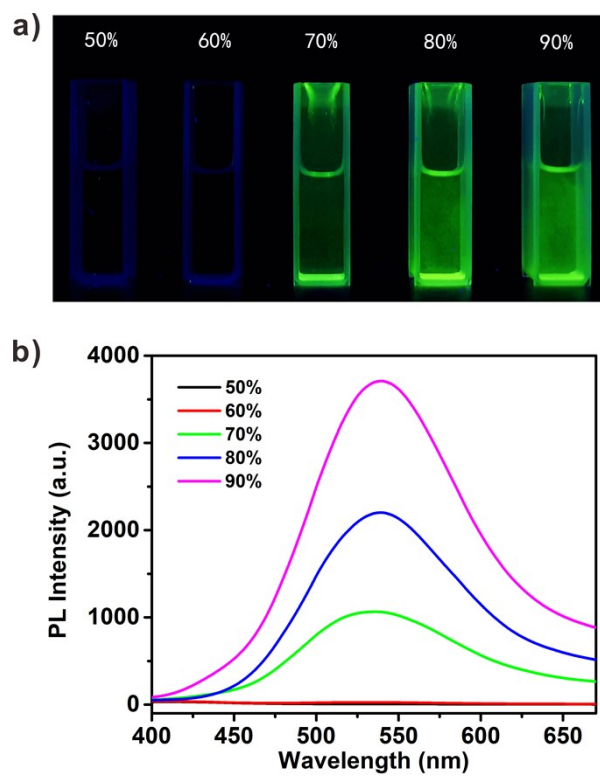

**Figure S22.** (a) Fluorescence photographs of  $\text{Ag}_6$  in THF solution with different fractions of  $\text{Et}_2\text{O}$  under UV 365 nm. (b) The AIE activities of  $\text{Ag}_6$  in with different volume ratios of  $\text{Et}_2\text{O}$  in the THF/ $\text{Et}_2\text{O}$  mixture excited at 375 nm.

**Table S1.** Crystal data and structure refinement for **Ag<sub>6</sub>** and **Ag<sub>6</sub>(0)·Ag<sub>6</sub>(I)**.

| <i>Compounds</i>                                                                                      | <b>Ag<sub>6</sub></b>                                                                          | <b>Ag<sub>6</sub>(0)·Ag<sub>6</sub>(I)</b>                                                                      |
|-------------------------------------------------------------------------------------------------------|------------------------------------------------------------------------------------------------|-----------------------------------------------------------------------------------------------------------------|
| Chemical formula                                                                                      | C <sub>20</sub> H <sub>24</sub> O <sub>8</sub> F <sub>12</sub> S <sub>12</sub> Ag <sub>6</sub> | C <sub>60</sub> H <sub>93</sub> N <sub>3</sub> O <sub>19</sub> F <sub>18</sub> S <sub>30</sub> Ag <sub>12</sub> |
| Formula weight                                                                                        | 1652.33                                                                                        | 3758.76                                                                                                         |
| Crystal system                                                                                        | Monoclinic                                                                                     | Monoclinic                                                                                                      |
| Space group                                                                                           | <i>C2/c</i>                                                                                    | <i>P2<sub>1</sub>/n</i>                                                                                         |
| <i>a</i> , Å                                                                                          | 26.1584(5)                                                                                     | 15.6815(6)                                                                                                      |
| <i>b</i> , Å                                                                                          | 10.02650(10)                                                                                   | 15.1285(5)                                                                                                      |
| <i>c</i> , Å                                                                                          | 19.8095(4)                                                                                     | 48.3672(19)                                                                                                     |
| <i>α</i> , deg                                                                                        | 90                                                                                             | 90                                                                                                              |
| <i>β</i> , deg                                                                                        | 128.008(3)                                                                                     | 98.4260(10)                                                                                                     |
| <i>γ</i> , deg                                                                                        | 90                                                                                             | 90                                                                                                              |
| <i>V</i> , Å <sup>3</sup>                                                                             | 4093.72(18)                                                                                    | 11350.7(7)                                                                                                      |
| <i>Z</i>                                                                                              | 4                                                                                              | 4                                                                                                               |
| <i>ρ</i> <sub>calc</sub> , g/cm <sup>3</sup>                                                          | 2.681                                                                                          | 2.194                                                                                                           |
| <i>μ</i> , mm <sup>-1</sup>                                                                           | 29.221                                                                                         | 2.658                                                                                                           |
| Reflections collected                                                                                 | 51335                                                                                          | 123526                                                                                                          |
| Independent reflections                                                                               | 4128                                                                                           | 32340                                                                                                           |
| R <sub>int</sub>                                                                                      | 0.0425                                                                                         | 0.0400                                                                                                          |
| Reflections <i>I</i> > 2σ( <i>I</i> )                                                                 | 4075                                                                                           | 25427                                                                                                           |
| Parameters                                                                                            | 274                                                                                            | 1301                                                                                                            |
| GOF on F <sup>2</sup>                                                                                 | 1.057                                                                                          | 1.032                                                                                                           |
| <i>R</i> <sub>1</sub> <sup>a</sup> / <i>wR</i> <sub>2</sub> <sup>b</sup> ( <i>I</i> > 2σ( <i>I</i> )) | 0.0349/0.0916                                                                                  | 0.0534/0.0978                                                                                                   |
| <i>R</i> <sub>1</sub> <sup>a</sup> / <i>wR</i> <sub>2</sub> <sup>b</sup> ( <i>all</i> )               | 0.0355/0.0920                                                                                  | 0.0727/0.1040                                                                                                   |

**Table S2.** Selected bond lengths (in angstrom) of **Ag<sub>6</sub>(0)**, **Ag<sub>6</sub>(I)** and **Ag<sub>6</sub>** from DFT/PBE calculations. Experimental values are listed in parentheses for comparison.

| Bond                     |      | Ag-Ag                        | Ag-S                           | Ag-O<br>/Ag-C              |
|--------------------------|------|------------------------------|--------------------------------|----------------------------|
| <b>Ag<sub>6</sub>(0)</b> | Exp. | 2.7880(6)-2.8175(6)<br>2.801 | 2.5826(14)-2.6381(16)<br>2.611 | 2.592(1)-3.146(1)<br>2.859 |
|                          | Cal. | 2.913-2.931<br>2.920         | 2.785-2.806<br>2.799           | 2.672-2.809<br>2.734       |
| <b>Ag<sub>6</sub>(I)</b> | Exp. | 2.8759(5)-2.9282(5)<br>2.900 | 2.6229(14)-2.7570(14)<br>2.674 | 2.263(1)-2.357(1)<br>2.302 |
|                          | Cal. | 3.049-3.065<br>3.058         | 2.905-2.983<br>2.947           | 2.326-2.341<br>2.334       |
| <b>Ag<sub>6</sub></b>    | Exp. | 2.7568(5)-<br>2.8249(5)2.785 | 2.5959(12)-2.7819(14)<br>2.672 | 2.406(1)-2.793(1)<br>2.579 |
|                          | Cal. | 2.834-2.948<br>2.884         | 2.769-3.038<br>2.883           | 2.441-2.576<br>2.483       |

**Table S3.** Experimental and computed peak positions (in nm) in the optical absorption spectra.

| <b>Cluster</b>                             | <b>Peak</b> | <b>TDDFT</b> | <b>Exp.</b> |
|--------------------------------------------|-------------|--------------|-------------|
| <b>Ag<sub>6</sub>(0)·Ag<sub>6</sub>(I)</b> | i           | 238          | 237         |
|                                            | ii          | 314          | 326         |
| <b>Ag<sub>6</sub></b>                      | I           | 260          | 252         |
|                                            | II          | 308          | 306         |
